# Supplementary material for: Single, Dual, and Triple Use of Cigarettes, e-Cigarettes, and Snus among Adolescents in the Nordic Countries
Source: MDPI journal article supplement (doi:10.3390/ijerph19020683), 2022-01-07
Supplement: s1 [file s1]

**Table S1.** Descriptive statistics of the study population, by country, gender and study year.

|                                      |       | <i>Denmark<sup>a</sup></i> |      |                            | <i>Finland</i> | <i>Faroe Islands<sup>a</sup></i> |      |                            | <i>Iceland</i> | <i>Norway</i> | <i>Sweden<sup>a</sup></i> |      |                            |
|--------------------------------------|-------|----------------------------|------|----------------------------|----------------|----------------------------------|------|----------------------------|----------------|---------------|---------------------------|------|----------------------------|
| <i>Study year</i>                    |       | 2015                       | 2019 | p( $\chi^2$ ) <sup>b</sup> | 2019           | 2015                             | 2019 | p( $\chi^2$ ) <sup>b</sup> | 2019           | 2019          | 2015                      | 2019 | p( $\chi^2$ ) <sup>b</sup> |
| <i>Student participation rate, %</i> |       | 88 %                       | 88 % |                            | 88 %           | 92 %                             | 82 % |                            | No info        | 89 %          | 86 %                      | 85 % |                            |
| <i>Participants, N</i>               |       | 1670                       | 2487 |                            | 4476           | 511                              | 511  |                            | 2559           | 4325          | 2584                      | 2546 |                            |
| <i>Gender</i>                        | Boys  | 48 %                       | 48 % |                            | 50 %           | 50 %                             | 49%  |                            | 49 %           | 50 %          | 50 %                      | 49%  |                            |
|                                      | Girls | 52 %                       | 52 % |                            | 50 %           | 50 %                             | 51%  |                            | 51 %           | 50 %          | 50 %                      | 51%  |                            |
| <i>Cigarette use</i>                 |       |                            |      |                            |                |                                  |      |                            |                |               |                           |      |                            |
| <i>Lifetime, %</i>                   | Boys  | 37 %                       | 43 % | .004                       | 43%            | 50 %                             | 57%  | ns                         | 16%            | 29%           | 33 %                      | 26 % | .000                       |
|                                      | Girls | 41%                        | 41 % | ns                         | 35%            | 49 %                             | 34%  | .001                       | 14%            | 21%           | 34 %                      | 27 % | .000                       |
| <i>30 days, %</i>                    | Boys  | 17 %                       | 22%  | .006                       | 18%            | 17 %                             | 22%  | ns                         | 4%             | 13%           | 11 %                      | 10 % | ns                         |
|                                      | Girls | 21 %                       | 23%  | ns                         | 17%            | 20 %                             | 13%  | .044                       | 6%             | 7 %           | 14 %                      | 12 % | ns                         |
| <i>E-cigarette use</i>               |       |                            |      |                            |                |                                  |      |                            |                |               |                           |      |                            |
| <i>Lifetime, %</i>                   | Boys  | 42 %                       | 44 % | ns                         | 44 %           | 45 %                             | 53 % | ns                         | 40 %           | 39 %          | 33 %                      | 36 % | ns                         |
|                                      | Girls | 38 %                       | 27 % | .000                       | 24%            | 43 %                             | 27 % | .000                       | 40 %           | 22 %          | 25 %                      | 23 % | ns                         |
| <i>30 days, %</i>                    | Boys  | 18 %                       | 19 % | ns                         | 9 %            | 9 %                              | 12 % | ns                         | 15 %           | 13 %          | 11 %                      | 9 %  | .026                       |
|                                      | Girls | 14 %                       | 10 % | .003                       | 5 %            | 9 %                              | 5 %  | .044                       | 19 %           | 7 %           | 7 %                       | 4 %  | .001                       |
| <i>Snus use</i>                      |       |                            |      |                            |                |                                  |      |                            |                |               |                           |      |                            |
| <i>Lifetime, %</i>                   | Boys  | 19 %                       | -    |                            | 35 %           | 45 %                             | -    |                            | 9 %            | 22 %          | 29 %                      | -    |                            |
|                                      | Girls | 8 %                        | -    |                            | 19 %           | 31 %                             | -    |                            | 9 %            | 17 %          | 13 %                      | -    |                            |
| <i>30 days, %</i>                    | Boys  | 11 %                       | -    |                            | 11 %           | 21 %                             | -    |                            | 3 %            | 5 %           | 15 %                      | -    |                            |
|                                      | Girls | 4 %                        | -    |                            | 9 %            | 10 %                             | -    |                            | 2 %            | 3 %           | 5 %                       | -    |                            |

<sup>a</sup>For Denmark, Faroe Islands and Sweden, data from 2015 was used.

<sup>b</sup>Chi-square tests were used to assess the statistical significance in the prevalence of different tobacco and nicotine product use between years 2015 and 2019 in countries where data from 2015 was used.

€For comparison with other ESPAD countries, see [http://espad.org/sites/espad.org/files/20203880\\_TD0320532ENN\\_PDF.pdf](http://espad.org/sites/espad.org/files/20203880_TD0320532ENN_PDF.pdf).
